# Supplementary material for: Phylogenetic and Expression Analysis of CENH3 and APOLLO Genes in Sexual and Apomictic Boechera Species
Source: Preprints.org preprint supplement (doi:10.20944/preprints202101.0320.v2), 2021-12-20
Supplement: Supplementary file 1 [file supplementary]

## Sheet: Table 1S
Table 1S – List of assemblies characteristics
Accession	Assembly length, Mb	N50, Kb	Largest contig, Kb
B. spatifolia	132.8	2.3	23.4
(Alvarado1_2)
B. spatifolia	132.4	3.2	27.7
(Alvarado1_3)
B. spatifolia	97.6	1.05	11.8
(Alvarado2_1)
B. spatifolia	129.7	2.02	19.3
(Alvarado2_2)
B. spatifolia	137.9	8.3	72.8
(Chicago2)
B. spatifolia	146	2.6	22.9
(Chicago4)
B. spatifolia	150.6	3.9	35.4
(Chiquito4)
B. spatifolia	133.5	1.9	16.4
(Chiquito7)
B. spatifolia	158.9	13.8	139.8
(Cripple6)
B. spatifolia	146.5	3.1	23.7
(Cripple7)
B. spatifolia	140.9	15.5	137.8
(Rosita3)
B. spatifolia	146.7	3.2	27.6
(Rosita4)
B. spatifolia	146.4	2.8	23.8
(Royal1)
B. spatifolia	155.7	13	123.6
(Royal2)
B. spatifolia	144.7	6.1	70.8
(Tiesiding2)
B. spatifolia	146.8	1.5	15.2
(Tiesiding7)
B. perrenas	510	3.6	157.6
B. divaricarpa	299.1	7	113.5

## Sheet: 2S Apomict Allel APOLLO
Group			Average	SD	SE
B. Stricta	Anter	Before Meiosis	0.218456	0.353284	0.203969
B. Divaricarpa	Anter	Before Meiosis	1.15825	0.67606	0.390324
B. Stricta	Pistil	Before Meiosis	0.130865	0.100366	0.0579465
B. Divaricarpa	Pistil	Before Meiosis	1.53754	1.30508	0.753488
B. Stricta	Anter	After Meiosis	0.0285184	0.0330542	0.0190838
B. Divaricarpa	Anter	After Meiosis	1.37836	1.01674	0.587016
B. Stricta	Pistil	After Meiosis	0.00277012	0.00367185	0.00211994
B. Divaricarpa	Pistil	After Meiosis	0.330211	0.191467	0.110544
B. Stricta	Silique	1 Days after Pollination	4.02428e-05	1.83486e-05	1.05936e-05
B. Divaricarpa	Silique	1 Days after Pollination	0.0372678	0.0138305	0.00798505
B. Stricta	Silique	3 Days after Pollination	0.00109626	0.00187249	0.00108108
B. Divaricarpa	Silique	3 Days after Pollination	0.173973	0.124206	0.0717103
B. Stricta	Silique	4 Days after Pollination	0.00371576	0.00632582	0.00365222
B. Divaricarpa	Silique	4 Days after Pollination	0.444977	0.138116	0.0797412
B. Stricta	Silique	5 Days after Pollination	0.298287	0.0388752	0.0224446
B. Divaricarpa	Silique	5 Days after Pollination	7.91371	2.61743	1.51118

## Sheet: 2S Sexual Allel APOLLO
Group			Average	SD	SE
B. Stricta	Anter	Before Meiosis	17.8299	17.3108	9.99442
B. Divaricarpa	Anter	Before Meiosis	1.09466	0.503334	0.2906
B. Stricta	Pistil	Before Meiosis	7.55356	2.45484	1.4173
B. Divaricarpa	Pistil	Before Meiosis	1.31175	1.33139	0.768677
B. Stricta	Anter	After Meiosis	15.9309	16.7032	9.6436
B. Divaricarpa	Anter	After Meiosis	1.26009	0.872349	0.503651
B. Stricta	Pistil	After Meiosis	2.51223	2.86888	1.65635
B. Divaricarpa	Pistil	After Meiosis	0.384258	0.0923574	0.0533226
B. Stricta	Silique	1 Days after Pollination	0.120412	0.0957308	0.0552702
B. Divaricarpa	Silique	1 Days after Pollination	0.187754	0.0661019	0.038164
B. Stricta	Silique	3 Days after Pollination	0.697157	0.523724	0.302372
B. Divaricarpa	Silique	3 Days after Pollination	0.217705	0.0920229	0.0531294
B. Stricta	Silique	4 Days after Pollination	1.07108	0.60552	0.349597
B. Divaricarpa	Silique	4 Days after Pollination	0.864661	0.063638	0.0367414
B. Stricta	Silique	5 Days after Pollination	6.03601	6.67776	3.8554
B. Divaricarpa	Silique	5 Days after Pollination	0.477439	0.193639	0.111798

## Sheet: 2S Apollo Both Allels
Group			Average	SD	SE
B. Stricta	Anter	Before Meiosis	1.06179	0.452492	0.261246
B. Divaricarpa	Anter	Before Meiosis	2.36552	2.11648	1.22195
B. Stricta	Pistil	Before Meiosis	1.42524	0.753267	0.434899
B. Divaricarpa	Pistil	Before Meiosis	1.18832	0.150264	0.0867548
B. Stricta	Anter	After Meiosis	0.00354283	0.000446664	0.000257882
B. Divaricarpa	Anter	After Meiosis	0.0172337	0.00892663	0.00515379
B. Stricta	Pistil	After Meiosis	0.207398	0.0311921	0.0180087
B. Divaricarpa	Pistil	After Meiosis	0.272542	0.0561026	0.0323909
B. Stricta	Silique	1 Days after Pollination	1.683	0.502722	0.290247
B. Divaricarpa	Silique	1 Days after Pollination	1.78722	0.650732	0.3757
B. Stricta	Silique	3 Days after Pollination	1.90269	0.295941	0.170862
B. Divaricarpa	Silique	3 Days after Pollination	2.71352	0.431543	0.249152
B. Stricta	Silique	4 Days after Pollination	7.40342	1.34814	0.953282
B. Divaricarpa	Silique	4 Days after Pollination	4.38662	0.339842	0.240304
B. Stricta	Silique	5 Days after Pollination	28.0646	13.4336	7.75588
B. Divaricarpa	Silique	5 Days after Pollination	6.30753	1.47982	0.854372

## Sheet: 2S Cenh3
Group			Average	SD	SE
B. Stricta	Anter	Before Meiosis	1.00081	0.0499052	0.0288128
B. Divaricarpa	Anter	Before Meiosis	1.51541	0.711133	0.410573
B. Stricta	Pistil	Before Meiosis	1.80138	0.495786	0.286242
B. Divaricarpa	Pistil	Before Meiosis	0.769267	0.564399	0.325856
B. Stricta	Anter	After Meiosis	0.00822483	0.00341237	0.00197013
B. Divaricarpa	Anter	After Meiosis	0.0227245	0.00339266	0.00195875
B. Stricta	Pistil	After Meiosis	0.441339	0.0805479	0.0465044
B. Divaricarpa	Pistil	After Meiosis	0.138359	0.00375156	0.00216597
B. Stricta	Silique	1 Days after Pollination	2.34363	0.783267	0.45222
B. Divaricarpa	Silique	1 Days after Pollination	1.31566	0.439333	0.253649
B. Stricta	Silique	3 Days after Pollination	2.17159	0.991993	0.572728
B. Divaricarpa	Silique	3 Days after Pollination	2.20313	0.22587	0.130406
B. Stricta	Silique	4 Days after Pollination	13.6267	0.463622	0.32783
B. Divaricarpa	Silique	4 Days after Pollination	2.20894	0.288235	0.203813
B. Stricta	Silique	5 Days after Pollination	11.4524	3.19366	1.84386
B. Divaricarpa	Silique	5 Days after Pollination	3.15129	0.915695	0.528677
